# Supplementary material
Source: PubMed Central journal article supplement (PMC6711310)
Supplement: rstb20180336supp2.pdf [file rstb20180336supp2.pdf]

**Table S1 Factors that lead to synchrony or asynchrony of disease dynamics in space and time.**

| <b>Causes of spatial synchrony</b>                                                    | <b>Causes of spatial asynchrony</b>                                                                    |
|---------------------------------------------------------------------------------------|--------------------------------------------------------------------------------------------------------|
| Rates of movement between populations that are high relative to the infectious period | Host populations that are patchy and isolated                                                          |
| Environmental synchrony caused by extreme weather                                     | Environmental asynchrony and local feedbacks in disease dynamics                                       |
| Spatially homogenous resources                                                        | Spatial variability in resources                                                                       |
| Infectious periods that are long relative to the life span of hosts                   | Infectious periods that are short relative to the life span of hosts                                   |
| Short-lived immunity that allows rapid reinfection                                    | Strong, enduring immunity (e.g., measles virus in humans).                                             |
| Pathogens with frequency-dependent dynamics                                           | Pathogens with density-dependent dynamics                                                              |
| Low host specificity                                                                  | High host specificity                                                                                  |
| <b>Causes of temporal consistency</b>                                                 | <b>Causes of temporal variability</b>                                                                  |
| Infectious periods that are long relative to the life span of hosts                   | Infectious periods that are short relative to the life span of hosts                                   |
| Persistent infections or rapid recovery and reinfection rates                         | Enduring immunity, particularly when transmission is density dependent                                 |
| Pathogens with frequency-dependent dynamics                                           | Pathogens with density-dependent dynamics in conjunction with seasonal aggregations of hosts or births |
| Host density dependence that operates by suppressing birth rates                      | Host density dependence that operates by increasing adult mortality and allowing higher birth rates    |
